# Supplementary material for: Comparative analysis of single-cell transcriptome reveals heterogeneity and commonality in the immune microenvironment of colorectal cancer and inflammatory bowel disease
Source: Front Immunol. 2024 Mar 11;15:1356075. doi: 10.3389/fimmu.2024.1356075 (PMC10961339; doi:10.3389/fimmu.2024.1356075)
Supplement: Supplementary Table 1 — Baseline Clinical characteristics of all samples in CRC and IBD. [file Table_1.xlsx]

## Sheet: Supplementary Table 1 samples3
orig.ident	Class	Group	Sex	Age	Stage	MSIstate	Position	organism.part	No.cells
scrEXT009	Tumor	EMTAB.8107	NA	NA	NA	NA	NA	colon	4467
scrEXT010	Border	EMTAB.8107	NA	NA	NA	NA	NA	colon	4183
scrEXT018	Tumor	EMTAB.8107	NA	NA	NA	NA	NA	colon	3148
scrEXT012	Tumor	EMTAB.8107	NA	NA	NA	NA	NA	colon	2569
scrEXT002	Border	EMTAB.8107	NA	NA	NA	NA	NA	colon	2522
scrEXT003	Normal	EMTAB.8107	NA	NA	NA	NA	NA	colon	2431
scrEXT001	Tumor	EMTAB.8107	NA	NA	NA	NA	NA	colon	2386
scrEXT029	Normal	EMTAB.8107	NA	NA	NA	NA	NA	colon	2359
scrEXT011	Normal	EMTAB.8107	NA	NA	NA	NA	NA	colon	2231
scrEXT013	Border	EMTAB.8107	NA	NA	NA	NA	NA	colon	2059
scrEXT019	Border	EMTAB.8107	NA	NA	NA	NA	NA	colon	1815
scrEXT014	Normal	EMTAB.8107	NA	NA	NA	NA	NA	colon	1719
scrEXT020	Normal	EMTAB.8107	NA	NA	NA	NA	NA	colon	1655
scrEXT023	Normal	EMTAB.8107	NA	NA	NA	NA	NA	colon	1117
scrEXT026	Normal	EMTAB.8107	NA	NA	NA	NA	NA	colon	923
scrEXT028	Border	EMTAB.8107	NA	NA	NA	NA	NA	colon	876
scrEXT021	Tumor	EMTAB.8107	NA	NA	NA	NA	NA	colon	629
scrEXT027	Tumor	EMTAB.8107	NA	NA	NA	NA	NA	colon	617
scrEXT025	Border	EMTAB.8107	NA	NA	NA	NA	NA	colon	529
scrEXT022	Border	EMTAB.8107	NA	NA	NA	NA	NA	colon	525
scrEXT024	Tumor	EMTAB.8107	NA	NA	NA	NA	NA	colon	457
SMC13T.A1.F	Tumor	GSE132257	NA	NA	NA	NA	NA	colon	3054
SMC13T.A1	Tumor	GSE132257	NA	NA	NA	NA	NA	colon	2242
SMC13N.A1.F	Normal	GSE132257	NA	NA	NA	NA	NA	Normal	1745
SMC171.T	Tumor	GSE132257	NA	NA	NA	NA	NA	colon	1683
SMC171.N	Normal	GSE132257	NA	NA	NA	NA	NA	Normal	1646
SMC171.T.BEL	Tumor	GSE132257	NA	NA	NA	NA	NA	colon	1582
SMC171.N.SGI	Normal	GSE132257	NA	NA	NA	NA	NA	Normal	1572
SMC171.T.SGI	Tumor	GSE132257	NA	NA	NA	NA	NA	colon	1567
SMC13N.A1	Normal	GSE132257	NA	NA	NA	NA	NA	Normal	1311
SMC171.N.BEL	Normal	GSE132257	NA	NA	NA	NA	NA	Normal	1189
SMC07.T	Tumor	GSE132465	F	67	I	MSS	Right	colon	3842
SMC09.T	Tumor	GSE132465	M	75	II	MSS	Left	colon	3690
SMC16.T	Tumor	GSE132465	M	59	III	MSS	Right	colon	2885
SMC01.T	Tumor	GSE132465	F	64	II	MSS	Left	rectum	2639
SMC01.N	Normal	GSE132465	F	64	II	MSS	Left	rectum	2348
SMC21.T	Tumor	GSE132465	M	51	IV	MSS	Left	rectum	2252
SMC22.T	Tumor	GSE132465	M	76	III	MSS	Left	colon	2204
SMC07.N	Normal	GSE132465	F	67	I	MSS	Right	colon	2178
SMC10.T	Tumor	GSE132465	F	77	II	MSI	Right	colon	2112
SMC15.T	Tumor	GSE132465	M	56	II	MSS	Left	colon	1982
SMC03.T	Tumor	GSE132465	F	83	III	MSI	Right	colon	1964
SMC08.T	Tumor	GSE132465	M	68	III	MSS	Left	colon	1960
SMC10.N	Normal	GSE132465	F	77	II	MSI	Right	colon	1927
SMC04.N	Normal	GSE132465	M	69	III	MSS	Left	colon	1741
SMC04.T	Tumor	GSE132465	M	69	III	MSS	Left	colon	1732
SMC18.T	Tumor	GSE132465	F	63	II	MSS	Left	colon	1723
SMC14.T	Tumor	GSE132465	M	77	III	MSS	Left	colon	1676
SMC08.N	Normal	GSE132465	M	68	III	MSS	Left	colon	1595
SMC11.T	Tumor	GSE132465	F	38	III	MSS	Left	colon	1586
SMC20.T	Tumor	GSE132465	F	65	III	MSS	Right	colon	1577
SMC25.T	Tumor	GSE132465	F	57	IV	MSS	Left	colon	1552
SMC23.T	Tumor	GSE132465	F	67	III	MSS	Right	colon	1531
SMC24.T	Tumor	GSE132465	F	48	I	MSI	Right	colon	1517
SMC06.T	Tumor	GSE132465	M	46	III	MSI	Right	colon	1506
SMC02.T	Tumor	GSE132465	M	66	III	MSS	Left	rectum	1505
SMC19.T	Tumor	GSE132465	F	80	III	MSS	Right	colon	1497
SMC06.N	Normal	GSE132465	M	46	III	MSI	Right	colon	1485
SMC02.N	Normal	GSE132465	M	66	III	MSS	Left	rectum	1263
SMC17.T	Tumor	GSE132465	M	47	III	MSS	Right	colon	1255
SMC03.N	Normal	GSE132465	F	83	III	MSI	Right	colon	1215
SMC09.N	Normal	GSE132465	M	75	II	MSS	Left	colon	1092
SMC05.N	Normal	GSE132465	F	58	II	MSS	Right	colon	1073
SMC05.T	Tumor	GSE132465	F	58	II	MSS	Right	colon	654
GSM3972020	IBD	GSE134809	NA	NA	NA	NA	NA	NA	10811
GSM3972026	IBD	GSE134809	NA	NA	NA	NA	NA	NA	9917
GSM3972024	IBD	GSE134809	NA	NA	NA	NA	NA	NA	4880
GSM3972030	IBD	GSE134809	NA	NA	NA	NA	NA	NA	4685
GSM3972016	IBD	GSE134809	NA	NA	NA	NA	NA	NA	4394
GSM3972017	IBD	GSE134809	NA	NA	NA	NA	NA	NA	3806
GSM3972009	IBD	GSE134809	NA	NA	NA	NA	NA	NA	3623
GSM3972013	IBD	GSE134809	NA	NA	NA	NA	NA	NA	2966
GSM3972022	IBD	GSE134809	NA	NA	NA	NA	NA	NA	2769
GSM3972028	IBD	GSE134809	NA	NA	NA	NA	NA	NA	2690
GSM3972011	IBD	GSE134809	NA	NA	NA	NA	NA	NA	889
KUL19.B	Border	GSE144735	F	86	III	MSS	Left	colon	3171
KUL19.T	Tumor	GSE144735	F	86	III	MSS	Left	colon	2991
KUL21.T	Tumor	GSE144735	F	50	IV	MSS	Left	colon	2070
KUL30.N	Normal	GSE144735	M	84	II	MSS	Right	Normal	2034
KUL01.N	Normal	GSE144735	F	81	II	MSI	Right	Normal	1967
KUL01.B	Border	GSE144735	F	81	II	MSI	Right	Cecum	1935
KUL19.N	Normal	GSE144735	F	86	III	MSS	Left	Normal	1821
KUL01.T	Tumor	GSE144735	F	81	II	MSI	Right	Cecum	1787
KUL21.B	Border	GSE144735	F	50	IV	MSS	Left	colon	1688
KUL31.N	Normal	GSE144735	M	85	I	MSS	Left	Normal	1439
KUL21.N	Normal	GSE144735	F	50	IV	MSS	Left	Normal	1299
KUL31.B	Border	GSE144735	M	85	I	MSS	Left	colon	1031
KUL28.N	Normal	GSE144735	M	52	II	MSS	Left	Normal	885
KUL30.B	Border	GSE144735	M	84	II	MSS	Right	colon	731
KUL30.T	Tumor	GSE144735	M	84	II	MSS	Right	colon	516
KUL28.T	Tumor	GSE144735	M	52	II	MSS	Left	colon	414
KUL28.B	Border	GSE144735	M	52	II	MSS	Left	colon	397
KUL31.T	Tumor	GSE144735	M	85	I	MSS	Left	colon	68
GSM4523789	IBD	GSE150115	M	20	NA	NA	NA	NA	2336
GSM4523791	IBD	GSE150115	M	15	NA	NA	NA	NA	2160
GSM4523792	IBD	GSE150115	M	19	NA	NA	NA	NA	544
GSM4523790	IBD	GSE150115	M	14	NA	NA	NA	NA	499
GSM4523793	IBD	GSE150115	F	21	NA	NA	NA	NA	301
GSM4904239	Tumor	GSE161277	NA	NA	NA	NA	NA	colon	5078
GSM4904240	Normal	GSE161277	NA	NA	NA	NA	NA	Normal	4890
GSM4904246	Normal	GSE161277	NA	NA	NA	NA	NA	Normal	3748
GSM4904237	Normal	GSE161277	NA	NA	NA	NA	NA	Normal	3097
GSM4904236	Tumor	GSE161277	NA	NA	NA	NA	NA	colon	2938
GSM4904245	Tumor	GSE161277	NA	NA	NA	NA	NA	colon	2338
GSM4904234	Tumor	GSE161277	NA	NA	NA	NA	NA	colon	1852
GSM5024093	Normal	GSE164985	F	72	NA	NA	NA	NA	2367
GSM5024090	Normal	GSE164985	M	55	NA	NA	NA	NA	2247
GSM5024091	Normal	GSE164985	M	64	NA	NA	NA	NA	1711
GSM5024089	IBD	GSE164985	M	68	NA	NA	NA	NA	1414
GSM5024092	Normal	GSE164985	M	63	NA	NA	NA	NA	967
GSM5024088	IBD	GSE164985	F	56	NA	NA	NA	NA	914
GSM5024087	IBD	GSE164985	M	25	NA	NA	NA	NA	192
p009-Normal	Normal	GSE166555	M	NA	I	MSS	NA	Normal	6899
p009-Tumor	Tumor	GSE166555	M	NA	I	MSS	NA	colon	6539
p017-Tumor	Tumor	GSE166555	F	NA	III	MSS	NA	colon	5149
p012-Normal	Normal	GSE166555	M	NA	NA	MSS	NA	Normal	4421
p012-Tumor	Tumor	GSE166555	M	NA	NA	MSS	NA	colon	3958
p016-Normal	Normal	GSE166555	M	NA	II	NA	NA	Normal	3726
p013-Normal	Normal	GSE166555	M	NA	IV	MSS	NA	Normal	3556
p026-Tumor	Tumor	GSE166555	M	NA	I	MSI	NA	colon	3427
p014-Tumor	Tumor	GSE166555	F	NA	III	MSS	NA	colon	3333
p013-Tumor	Tumor	GSE166555	M	NA	IV	MSS	NA	colon	3239
p008-Tumor	Tumor	GSE166555	M	NA	III	MSS	NA	Cecum	3207
p014-Normal	Normal	GSE166555	F	NA	III	MSS	NA	Normal	2851
p017-Normal	Normal	GSE166555	F	NA	III	MSS	NA	Normal	2847
p016-Tumor	Tumor	GSE166555	M	NA	II	NA	NA	rectum	2738
p007-Tumor	Tumor	GSE166555	M	NA	III	MSS	NA	Cecum	1928
p008-Normal	Normal	GSE166555	M	NA	III	MSS	NA	Normal	1274
p021-Tumor	Tumor	GSE166555	F	NA	I	MSS	NA	colon	1196
p007-Normal	Normal	GSE166555	M	NA	III	MSS	NA	Normal	1157
p021-Normal	Normal	GSE166555	F	NA	I	MSS	NA	Normal	1148
p025-Tumor	Tumor	GSE166555	M	NA	II	MSS	NA	colon	1049
p020-Normal	Normal	GSE166555	M	NA	III	MSS	NA	Normal	860
p025-Normal	Normal	GSE166555	M	NA	II	MSS	NA	Normal	692
p020-Tumor	Tumor	GSE166555	M	NA	III	MSS	NA	colon	392
GSM5525957	IBD	GSE182270	F	60	NA	NA	Left colon	colon	5275
GSM5525963	IBD	GSE182270	M	77	NA	NA	Left colon	colon	5155
GSM5525955	IBD	GSE182270	M	30	NA	NA	Left colon	colon	4600
GSM5525959	Normal	GSE182270	M	51	NA	NA	Left colon	colon	4012
GSM5525962	Normal	GSE182270	M	31	NA	NA	Left colon	colon	3123
GSM5525958	Normal	GSE182270	F	29	NA	NA	Left colon	colon	3019
GSM5525960	Normal	GSE182270	F	30	NA	NA	Left colon	colon	2903
GSM5525961	Normal	GSE182270	F	23	NA	NA	Left colon	colon	2880
GSM5525956	IBD	GSE182270	F	67	NA	NA	Left colon	colon	2216
GSM5583421	IBD	GSE184291	NA	NA	NA	NA	NA	NA	13995
GSM5583422	Normal	GSE184291	NA	NA	NA	NA	NA	NA	13065
GSM5688708	Tumor	GSE188711	M	65	I	MSS	Left	colon	5707
GSM5688709	Tumor	GSE188711	F	69	II	MSS	Right	colon	5656
GSM5688711	Tumor	GSE188711	M	59	II	MSS	Right	colon	4001
GSM5688710	Tumor	GSE188711	F	80	II	MSS	Right	colon	3826
GSM5688706	Tumor	GSE188711	F	57	I	MSS	Left	colon	3732
GSM5688707	Tumor	GSE188711	M	70	II	MSS	Left	colon	2695
B-cac14	Normal	GSE200997	NA	NA	NA	MSS	Left	Normal	4614
B-cac11	Normal	GSE200997	NA	NA	NA	MSS	Right	Normal	4497
T-cac12	Tumor	GSE200997	F	66	I	MSI	Right	Cecum	3900
T-cac14	Tumor	GSE200997	F	51	III	MSS	Left	colon	3864
T-cac15	Tumor	GSE200997	M	64	III	MSS	Left	colon	3588
T-cac11	Tumor	GSE200997	M	70	II	MSS	Right	colon	2662
B-cac10	Normal	GSE200997	NA	NA	NA	MSS	Left	Normal	2563
B-cac4	Normal	GSE200997	NA	NA	NA	MSS	Left	Normal	2537
T-cac13	Tumor	GSE200997	F	68	I	MSS	Right	Cecum	2494
T-cac6	Tumor	GSE200997	M	75	I	MSS	Left	colon	1601
T-cac4	Tumor	GSE200997	F	80	II	MSS	Left	colon	1542
T-cac9	Tumor	GSE200997	M	72	I	MSS	Left	colon	1474
T-cac2	Tumor	GSE200997	M	83	IV	MSS	Left	colon	1400
T-cac1	Tumor	GSE200997	F	76	III	MSS	Right	Cecum	1357
T-cac7	Tumor	GSE200997	M	78	III	MSI	Right	Cecum	1305
B-cac7	Normal	GSE200997	NA	NA	NA	MSI	Right	Normal	1275
T-cac16	Tumor	GSE200997	F	64	II	MSS	Left	NA	1198
B-cac15	Normal	GSE200997	NA	NA	NA	MSS	Left	Normal	942
T-cac3	Tumor	GSE200997	M	68	III	MSS	Right	colon	929
T-cac8	Tumor	GSE200997	M	38	III	MSS	Right	Cecum	838
T-cac10	Tumor	GSE200997	M	55	I	MSS	Left	colon	657
B-cac6	Normal	GSE200997	NA	NA	NA	MSS	Left	Normal	648
T-cac5	Tumor	GSE200997	M	37	III	MSS	Right	Cecum	150
