# Supplementary material for: Comparative analysis of single-cell transcriptome reveals heterogeneity and commonality in the immune microenvironment of colorectal cancer and inflammatory bowel disease
Source: Front Immunol. 2024 Mar 11;15:1356075. doi: 10.3389/fimmu.2024.1356075 (PMC10961339; doi:10.3389/fimmu.2024.1356075)
Supplement: Supplementary Table 5 — Functional enrichment analyses for MPs in CRC malignant cells, CRC non-malignant cells, and IBD epithelial cells. [file Table_5.xls]

## Sheet: CRCandIBD_Epithelial_MP
CRC_Malignant_MP_1	CRC_non-Malignant_MP1	CRC_non-Malignant_MP2	IBD_Epithelial_MP1
H.HALLMARK_G2M_CHECKPOINT	H.HALLMARK_G2M_CHECKPOINT	H.HALLMARK_ALLOGRAFT_REJECTION	H.HALLMARK_ALLOGRAFT_REJECTION
H.HALLMARK_E2F_TARGETS	H.HALLMARK_E2F_TARGETS	H.HALLMARK_INFLAMMATORY_RESPONSE	C5.GOCC_EXTERNAL_SIDE_OF_PLASMA_MEMBRANE
H.HALLMARK_MITOTIC_SPINDLE	H.HALLMARK_MITOTIC_SPINDLE	C5.GOCC_EXTERNAL_SIDE_OF_PLASMA_MEMBRANE	C5.GOBP_T_CELL_DIFFERENTIATION
C5.GOBP_ORGANELLE_FISSION	C5.GOBP_ORGANELLE_FISSION	C5.GOBP_T_CELL_DIFFERENTIATION	C5.GOBP_POSITIVE_T_CELL_SELECTION
C5.GOBP_MITOTIC_NUCLEAR_DIVISION	C5.GOBP_CHROMOSOME_SEGREGATION	C5.GOBP_POSITIVE_THYMIC_T_CELL_SELECTION	C5.GOBP_T_CELL_SELECTION
C5.GOBP_MICROTUBULE_CYTOSKELETON_ORGANIZATION_INVOLVED_IN_MITOSIS	C5.GOBP_SISTER_CHROMATID_SEGREGATION	C5.GOBP_THYMIC_T_CELL_SELECTION	C5.GOBP_POSITIVE_THYMIC_T_CELL_SELECTION
C5.GOBP_CHROMOSOME_SEGREGATION	C5.GOBP_MITOTIC_NUCLEAR_DIVISION	C5.GOBP_T_CELL_DIFFERENTIATION_IN_THYMUS	C5.GOBP_ANTIGEN_RECEPTOR_MEDIATED_SIGNALING_PATHWAY
C5.GOBP_MITOTIC_SISTER_CHROMATID_SEGREGATION	C5.GOCC_SPINDLE	C5.GOBP_POSITIVE_REGULATION_OF_CELL_ACTIVATION	C5.GOCC_T_CELL_RECEPTOR_COMPLEX
C5.GOBP_MITOTIC_CYTOKINESIS	C5.GOBP_MICROTUBULE_CYTOSKELETON_ORGANIZATION_INVOLVED_IN_MITOSIS	C5.GOBP_MONONUCLEAR_CELL_DIFFERENTIATION	C5.GOBP_POSITIVE_REGULATION_OF_CELL_ACTIVATION
C5.GOBP_SISTER_CHROMATID_SEGREGATION	C5.GOBP_MITOTIC_CELL_CYCLE_PHASE_TRANSITION	C5.GOBP_POSITIVE_T_CELL_SELECTION	C5.GOBP_MONONUCLEAR_CELL_DIFFERENTIATION
C5.GOBP_MITOTIC_CELL_CYCLE_PHASE_TRANSITION	C5.GOBP_MITOTIC_SISTER_CHROMATID_SEGREGATION	C5.GOMF_T_CELL_RECEPTOR_BINDING	C5.GOBP_THYMIC_T_CELL_SELECTION
C5.GOBP_CYTOSKELETON_DEPENDENT_CYTOKINESIS	C5.GOBP_NUCLEAR_CHROMOSOME_SEGREGATION	C5.GOCC_IMMUNOLOGICAL_SYNAPSE	C5.GOBP_IMMUNE_RESPONSE_REGULATING_CELL_SURFACE_RECEPTOR_SIGNALING_PATHWAY
C5.GOBP_NON_MEMBRANE_BOUNDED_ORGANELLE_ASSEMBLY	C5.GOBP_SPINDLE_ORGANIZATION	C5.GOBP_REGULATION_OF_T_CELL_ACTIVATION	C5.GOBP_REGULATION_OF_T_CELL_ACTIVATION
C5.GOCC_SPINDLE	C5.GOBP_CHROMOSOME_SEPARATION	C5.GOBP_T_CELL_SELECTION	C5.GOBP_LYMPHOCYTE_ACTIVATION_INVOLVED_IN_IMMUNE_RESPONSE
C5.GOBP_NUCLEAR_CHROMOSOME_SEGREGATION	C5.GOCC_SPINDLE_POLE	C5.GOBP_REGULATION_OF_LYMPHOCYTE_APOPTOTIC_PROCESS	C5.GOBP_LYMPHOCYTE_MEDIATED_IMMUNITY
C5.GOBP_SPINDLE_ORGANIZATION	C5.GOCC_CONDENSED_CHROMOSOME	C5.GOCC_T_CELL_RECEPTOR_COMPLEX	C5.GOBP_ACTIVATION_OF_IMMUNE_RESPONSE
C5.GOBP_MITOTIC_SPINDLE_ORGANIZATION	C5.GOBP_MITOTIC_SPINDLE_ORGANIZATION	C5.GOBP_NEGATIVE_REGULATION_OF_T_CELL_APOPTOTIC_PROCESS	C5.GOBP_MYELOID_LEUKOCYTE_ACTIVATION
C5.GOCC_CONDENSED_CHROMOSOME_CENTROMERIC_REGION	C5.GOBP_REGULATION_OF_CHROMOSOME_SEPARATION	C5.GOBP_LYMPHOCYTE_APOPTOTIC_PROCESS	C5.GOBP_B_CELL_RECEPTOR_SIGNALING_PATHWAY
C5.GOCC_CONDENSED_CHROMOSOME	C5.GOBP_REGULATION_OF_NUCLEAR_DIVISION	C5.GOBP_REGULATION_OF_LEUKOCYTE_APOPTOTIC_PROCESS	C5.GOBP_T_CELL_RECEPTOR_SIGNALING_PATHWAY
C5.GOBP_CYTOKINESIS	C5.GOCC_CHROMOSOME_CENTROMERIC_REGION	C5.GOBP_DENDRITIC_CELL_CHEMOTAXIS	C5.GOBP_POSITIVE_REGULATION_OF_CELL_ADHESION
C5.GOCC_CYCLIN_DEPENDENT_PROTEIN_KINASE_HOLOENZYME_COMPLEX	C5.GOBP_REGULATION_OF_MITOTIC_CELL_CYCLE	C5.GOCC_CYTOPLASMIC_SIDE_OF_MEMBRANE	C5.GOBP_LEUKOCYTE_MEDIATED_IMMUNITY
C5.GOCC_CHROMOSOME_CENTROMERIC_REGION	C5.GOCC_CONDENSED_CHROMOSOME_CENTROMERIC_REGION	C5.GOBP_DENDRITIC_CELL_MIGRATION	C5.GOBP_ACTIN_NUCLEATION
C5.GOBP_REGULATION_OF_UBIQUITIN_PROTEIN_LIGASE_ACTIVITY	C5.GOBP_REGULATION_OF_CHROMOSOME_SEGREGATION	C5.GOBP_NEGATIVE_REGULATION_OF_LYMPHOCYTE_APOPTOTIC_PROCESS	C5.GOBP_POSITIVE_REGULATION_OF_CYTOKINE_PRODUCTION
C5.GOCC_CHROMOSOMAL_REGION	C5.GOCC_CHROMOSOMAL_REGION	C5.GOBP_REGULATION_OF_T_CELL_APOPTOTIC_PROCESS	C5.GOBP_CELL_ACTIVATION_INVOLVED_IN_IMMUNE_RESPONSE
C5.GOBP_SPINDLE_ASSEMBLY	C5.GOBP_KINETOCHORE_ORGANIZATION	C5.GOBP_LEUKOCYTE_CELL_CELL_ADHESION	C5.GOBP_IMMUNE_RESPONSE_REGULATING_SIGNALING_PATHWAY
C5.GOBP_MITOTIC_SPINDLE_ASSEMBLY	C5.GOBP_NON_MEMBRANE_BOUNDED_ORGANELLE_ASSEMBLY	C5.GOBP_LEUKOCYTE_APOPTOTIC_PROCESS	C5.GOBP_CYTOKINE_MEDIATED_SIGNALING_PATHWAY
C5.GOCC_SPINDLE_POLE	C5.GOBP_REGULATION_OF_MITOTIC_NUCLEAR_DIVISION	C5.GOBP_POSITIVE_REGULATION_OF_LEUKOCYTE_CELL_CELL_ADHESION	C5.GOBP_PHAGOCYTOSIS
C5.GOCC_MICROTUBULE	C5.GOBP_METAPHASE_ANAPHASE_TRANSITION_OF_CELL_CYCLE	C5.GOBP_REGULATION_OF_CELL_CELL_ADHESION	C5.GOCC_PLASMA_MEMBRANE_SIGNALING_RECEPTOR_COMPLEX
C5.GOBP_REGULATION_OF_CYCLIN_DEPENDENT_PROTEIN_KINASE_ACTIVITY	C5.GOBP_MEIOTIC_CELL_CYCLE_PROCESS	C5.GOBP_NEGATIVE_REGULATION_OF_LEUKOCYTE_APOPTOTIC_PROCESS	C5.GOMF_T_CELL_RECEPTOR_BINDING
C5.GOBP_REGULATION_OF_MITOTIC_CELL_CYCLE	C5.GOBP_REGULATION_OF_MITOTIC_CELL_CYCLE_PHASE_TRANSITION	C5.GOBP_T_CELL_APOPTOTIC_PROCESS	C5.GOBP_HETEROTYPIC_CELL_CELL_ADHESION
C5.GOBP_POSITIVE_REGULATION_OF_UBIQUITIN_PROTEIN_LIGASE_ACTIVITY	C5.GOBP_REGULATION_OF_CHROMOSOME_ORGANIZATION	C5.GOBP_POSITIVE_REGULATION_OF_CELL_CELL_ADHESION	C5.GOBP_B_CELL_ACTIVATION
C5.GOBP_POSITIVE_REGULATION_OF_CELL_CYCLE	C5.GOBP_POSITIVE_REGULATION_OF_CELL_CYCLE	C5.GOCC_PLASMA_MEMBRANE_SIGNALING_RECEPTOR_COMPLEX	C5.GOBP_REGULATION_OF_ANTIGEN_RECEPTOR_MEDIATED_SIGNALING_PATHWAY
C5.GOCC_MIDBODY	C5.GOBP_POSITIVE_REGULATION_OF_CELL_CYCLE_PROCESS	C5.GOBP_POSITIVE_REGULATION_OF_LEUKOCYTE_PROLIFERATION	C5.GOBP_REGULATION_OF_RESPONSE_TO_CYTOKINE_STIMULUS
C5.GOCC_PROTEIN_KINASE_COMPLEX	C5.GOBP_CELL_CYCLE_G2_M_PHASE_TRANSITION	C5.GOBP_NEGATIVE_REGULATION_OF_T_CELL_MEDIATED_CYTOTOXICITY	C5.GOBP_REGULATION_OF_CYTOSOLIC_CALCIUM_ION_CONCENTRATION
C5.GOBP_REGULATION_OF_ATTACHMENT_OF_SPINDLE_MICROTUBULES_TO_KINETOCHORE	C5.GOCC_MITOTIC_SPINDLE	C5.GOBP_HETEROTYPIC_CELL_CELL_ADHESION	C5.GOBP_REGULATION_OF_B_CELL_ACTIVATION
C5.GOMF_CYCLIN_DEPENDENT_PROTEIN_SERINE_THREONINE_KINASE_REGULATOR_ACTIVITY	C5.GOBP_NEGATIVE_REGULATION_OF_CHROMOSOME_ORGANIZATION	C5.GOBP_INTERLEUKIN_2_PRODUCTION	C5.GOBP_ADAPTIVE_IMMUNE_RESPONSE_BASED_ON_SOMATIC_RECOMBINATION_OF_IMMUNE_RECEPTORS_BUILT_FROM_IMMUNOGLOBULIN_SUPERFAMILY_DOMAINS
C5.GOBP_REGULATION_OF_UBIQUITIN_PROTEIN_TRANSFERASE_ACTIVITY	C5.GOBP_MEIOTIC_CELL_CYCLE	C5.GOBP_B_CELL_ACTIVATION	C5.GOBP_T_CELL_DIFFERENTIATION_IN_THYMUS
C5.GOBP_POSITIVE_REGULATION_OF_CELL_CYCLE_PROCESS	C5.GOBP_REGULATION_OF_MITOTIC_SISTER_CHROMATID_SEGREGATION	C5.GOBP_REGULATION_OF_CELL_CELL_ADHESION_MEDIATED_BY_INTEGRIN	C5.GOBP_LEUKOCYTE_CELL_CELL_ADHESION
C5.GOBP_REGULATION_OF_NUCLEAR_DIVISION	C5.GOBP_REGULATION_OF_CELL_CYCLE_PHASE_TRANSITION	C5.GOBP_LEUKOCYTE_PROLIFERATION	C5.GOMF_LIPASE_ACTIVATOR_ACTIVITY
C5.GOBP_ANAPHASE_PROMOTING_COMPLEX_DEPENDENT_CATABOLIC_PROCESS	C5.GOCC_CYCLIN_DEPENDENT_PROTEIN_KINASE_HOLOENZYME_COMPLEX	C5.GOBP_REGULATION_OF_ANTIGEN_RECEPTOR_MEDIATED_SIGNALING_PATHWAY	C5.GOBP_LEUKOCYTE_MIGRATION
C5.GOBP_KINETOCHORE_ASSEMBLY	C5.GOCC_MICROTUBULE	C5.GOBP_REGULATION_OF_RESPONSE_TO_CYTOKINE_STIMULUS	C5.GOBP_B_CELL_MEDIATED_IMMUNITY
C5.GOBP_CELL_CYCLE_G2_M_PHASE_TRANSITION	C5.GOBP_KINETOCHORE_ASSEMBLY	C5.GOBP_NEGATIVE_T_CELL_SELECTION	C5.GOBP_MAINTENANCE_OF_LOCATION_IN_CELL
C5.GOCC_MITOTIC_SPINDLE	C5.GOBP_MITOTIC_CELL_CYCLE_CHECKPOINT_SIGNALING	C5.GOCC_CLATHRIN_COATED_ENDOCYTIC_VESICLE_MEMBRANE	C5.GOBP_CELL_RECOGNITION
C5.GOCC_ANAPHASE_PROMOTING_COMPLEX	C5.GOBP_NEGATIVE_REGULATION_OF_ORGANELLE_ORGANIZATION	C5.GOBP_REGULATION_OF_B_CELL_ACTIVATION	C5.GOBP_NATURAL_KILLER_CELL_ACTIVATION
C5.GOBP_REGULATION_OF_CHROMOSOME_SEPARATION	C5.GOBP_SPINDLE_ASSEMBLY	C5.GOMF_LIPASE_ACTIVATOR_ACTIVITY	C5.GOBP_CALCIUM_ION_TRANSPORT
C5.GOBP_KINETOCHORE_ORGANIZATION	C5.GOBP_CENTROMERE_COMPLEX_ASSEMBLY	C5.GOBP_CELL_CELL_ADHESION_MEDIATED_BY_INTEGRIN	C2.KEGG_PRIMARY_IMMUNODEFICIENCY
C5.GOBP_REGULATION_OF_CHROMOSOME_SEGREGATION	C5.GOBP_MICROTUBULE_ORGANIZING_CENTER_LOCALIZATION	C5.GOBP_LYMPH_NODE_DEVELOPMENT	C2.KEGG_T_CELL_RECEPTOR_SIGNALING_PATHWAY
C5.GOBP_EXIT_FROM_MITOSIS	C5.GOBP_CHROMOSOME_LOCALIZATION	C5.GOCC_CLATHRIN_COATED_ENDOCYTIC_VESICLE	C2.KEGG_HEMATOPOIETIC_CELL_LINEAGE
C5.GOBP_PROTEIN_K11_LINKED_UBIQUITINATION	C5.GOBP_CELL_CYCLE_CHECKPOINT_SIGNALING	C5.GOBP_ANTIGEN_RECEPTOR_MEDIATED_SIGNALING_PATHWAY	C2.KEGG_CYTOKINE_CYTOKINE_RECEPTOR_INTERACTION
C5.GOBP_NEGATIVE_REGULATION_OF_ORGANELLE_ORGANIZATION	C5.GOBP_NEGATIVE_REGULATION_OF_CELL_CYCLE_PROCESS	C5.GOCC_EXTRINSIC_COMPONENT_OF_CYTOPLASMIC_SIDE_OF_PLASMA_MEMBRANE
C5.GOBP_CENTROMERE_COMPLEX_ASSEMBLY	C5.GOBP_NEGATIVE_REGULATION_OF_MITOTIC_CELL_CYCLE_PHASE_TRANSITION	C5.GOBP_B_CELL_PROLIFERATION
C5.GOBP_CHROMOSOME_SEPARATION	C5.GOBP_REGULATION_OF_CYCLIN_DEPENDENT_PROTEIN_KINASE_ACTIVITY	C5.GOBP_POSITIVE_REGULATION_OF_CELL_ADHESION_MEDIATED_BY_INTEGRIN
C5.GOBP_POSITIVE_REGULATION_OF_UBIQUITIN_PROTEIN_TRANSFERASE_ACTIVITY	C5.GOBP_NEGATIVE_REGULATION_OF_METAPHASE_ANAPHASE_TRANSITION_OF_CELL_CYCLE	C5.GOBP_POSITIVE_REGULATION_OF_CELL_ADHESION
C5.GOBP_REGULATION_OF_CHROMOSOME_ORGANIZATION	C5.GOCC_MIDBODY	C5.GOBP_POSITIVE_REGULATION_OF_T_CELL_PROLIFERATION
C5.GOBP_ESTABLISHMENT_OF_MITOTIC_SPINDLE_LOCALIZATION	C5.GOBP_REGULATION_OF_CELL_CYCLE_G2_M_PHASE_TRANSITION	C5.GOBP_REGULATION_OF_LEUKOCYTE_PROLIFERATION
C5.GOBP_REGULATION_OF_MITOTIC_NUCLEAR_DIVISION	C5.GOBP_HISTONE_PHOSPHORYLATION	C5.GOBP_POSITIVE_REGULATION_OF_ALPHA_BETA_T_CELL_PROLIFERATION
C5.GOBP_ATTACHMENT_OF_SPINDLE_MICROTUBULES_TO_KINETOCHORE	C5.GOCC_PROTEIN_KINASE_COMPLEX	C5.GOCC_CLATHRIN_COATED_VESICLE_MEMBRANE
C5.GOMF_KINASE_REGULATOR_ACTIVITY	C5.GOCC_PRONUCLEUS	C5.GOBP_MEMBRANE_RAFT_ORGANIZATION
C5.GOBP_CYTOKINETIC_PROCESS	C5.GOMF_CYCLIN_DEPENDENT_PROTEIN_SERINE_THREONINE_KINASE_REGULATOR_ACTIVITY	C5.GOBP_POSITIVE_REGULATION_OF_CYTOKINE_PRODUCTION
C5.GOMF_UBIQUITIN_LIKE_PROTEIN_CONJUGATING_ENZYME_ACTIVITY	C5.GOCC_SPINDLE_POLE_CENTROSOME	C5.GOBP_REGULATION_OF_RECEPTOR_SIGNALING_PATHWAY_VIA_STAT
C5.GOBP_NEGATIVE_REGULATION_OF_MICROTUBULE_POLYMERIZATION_OR_DEPOLYMERIZATION	C5.GOMF_TUBULIN_BINDING	C5.GOBP_POSITIVE_REGULATION_OF_ANTIGEN_RECEPTOR_MEDIATED_SIGNALING_PATHWAY
C5.GOCC_NUCLEAR_UBIQUITIN_LIGASE_COMPLEX	C5.GOBP_NEGATIVE_REGULATION_OF_MITOTIC_CELL_CYCLE	C5.GOBP_CYTOKINE_MEDIATED_SIGNALING_PATHWAY
C5.GOCC_TRANSFERASE_COMPLEX_TRANSFERRING_PHOSPHORUS_CONTAINING_GROUPS	C5.GOBP_MEIOTIC_SPINDLE_ORGANIZATION	C5.GOBP_INTERFERON_GAMMA_PRODUCTION
C5.GOBP_REGULATION_OF_MITOTIC_SISTER_CHROMATID_SEGREGATION	C5.GOBP_NEGATIVE_REGULATION_OF_NUCLEAR_DIVISION	C5.GOBP_NEGATIVE_REGULATION_OF_T_CELL_MEDIATED_IMMUNITY
C5.GOBP_MEIOTIC_CELL_CYCLE	C5.GOBP_NEGATIVE_REGULATION_OF_CELL_CYCLE	C2.KEGG_PRIMARY_IMMUNODEFICIENCY
C5.GOBP_MICROTUBULE_DEPOLYMERIZATION	C5.GOMF_HISTONE_KINASE_ACTIVITY	C2.KEGG_HEMATOPOIETIC_CELL_LINEAGE
C5.GOBP_SPINDLE_LOCALIZATION	C5.GOBP_MEIOSIS_I_CELL_CYCLE_PROCESS	C2.KEGG_T_CELL_RECEPTOR_SIGNALING_PATHWAY
C5.GOBP_NEGATIVE_REGULATION_OF_CELL_CYCLE_PROCESS	C5.GOBP_NEGATIVE_REGULATION_OF_CELL_CYCLE_PHASE_TRANSITION
C5.GOBP_REGULATION_OF_MITOTIC_CELL_CYCLE_PHASE_TRANSITION	C5.GOBP_ESTABLISHMENT_OF_ORGANELLE_LOCALIZATION
C5.GOBP_METAPHASE_ANAPHASE_TRANSITION_OF_CELL_CYCLE	C5.GOMF_MICROTUBULE_BINDING
C5.GOCC_CULLIN_RING_UBIQUITIN_LIGASE_COMPLEX	C5.GOBP_METAPHASE_PLATE_CONGRESSION
C5.GOBP_UBIQUITIN_RECYCLING	C5.GOBP_REGULATION_OF_UBIQUITIN_PROTEIN_LIGASE_ACTIVITY
C5.GOMF_CYCLIN_DEPENDENT_PROTEIN_SERINE_THREONINE_KINASE_ACTIVATOR_ACTIVITY	C5.GOCC_SPINDLE_MICROTUBULE
C5.GOCC_CELL_DIVISION_SITE	C5.GOBP_PROTEIN_DNA_COMPLEX_ASSEMBLY
C5.GOMF_TUBULIN_BINDING	C5.GOBP_POSITIVE_REGULATION_OF_MITOTIC_CELL_CYCLE_PHASE_TRANSITION
C5.GOBP_PROTEIN_DNA_COMPLEX_ASSEMBLY	C5.GOBP_FEMALE_MEIOTIC_NUCLEAR_DIVISION
C5.GOBP_REGULATION_OF_PROTEIN_SERINE_THREONINE_KINASE_ACTIVITY	C5.GOCC_MITOTIC_SPINDLE_POLE
C5.GOBP_MEIOTIC_CELL_CYCLE_PROCESS	C5.GOBP_ATTACHMENT_OF_SPINDLE_MICROTUBULES_TO_KINETOCHORE
C5.GOBP_NEGATIVE_REGULATION_OF_CELL_CYCLE	C5.GOMF_KINASE_REGULATOR_ACTIVITY
C5.GOBP_REGULATION_OF_MITOTIC_CELL_CYCLE_SPINDLE_ASSEMBLY_CHECKPOINT	C5.GOBP_POSITIVE_REGULATION_OF_CELL_CYCLE_PHASE_TRANSITION
C5.GOBP_REGULATION_OF_MICROTUBULE_POLYMERIZATION_OR_DEPOLYMERIZATION	C5.GOBP_DNA_PACKAGING
C5.GOBP_NEGATIVE_REGULATION_OF_CHROMOSOME_ORGANIZATION	C5.GOBP_PROTEIN_DNA_COMPLEX_SUBUNIT_ORGANIZATION
C5.GOBP_REGULATION_OF_EXIT_FROM_MITOSIS	C5.GOBP_POSITIVE_REGULATION_OF_MITOTIC_NUCLEAR_DIVISION
C5.GOBP_ESTABLISHMENT_OF_ORGANELLE_LOCALIZATION	C5.GOBP_POSITIVE_REGULATION_OF_MITOTIC_CELL_CYCLE
C5.GOBP_REGULATION_OF_CELL_CYCLE_PHASE_TRANSITION	C5.GOCC_TRANSFERASE_COMPLEX_TRANSFERRING_PHOSPHORUS_CONTAINING_GROUPS
C5.GOBP_POSITIVE_REGULATION_OF_MITOTIC_CELL_CYCLE_PHASE_TRANSITION	C5.GOBP_CHROMOSOME_CONDENSATION
C5.GOBP_NEGATIVE_REGULATION_OF_UBIQUITIN_PROTEIN_TRANSFERASE_ACTIVITY	C5.GOBP_MITOTIC_METAPHASE_PLATE_CONGRESSION
C5.GOBP_REGULATION_OF_PROTEIN_MODIFICATION_BY_SMALL_PROTEIN_CONJUGATION_OR_REMOVAL	C5.GOBP_SPINDLE_LOCALIZATION
C5.GOBP_DNA_PACKAGING	C5.GOBP_REGULATION_OF_UBIQUITIN_PROTEIN_TRANSFERASE_ACTIVITY
C5.GOBP_PROTEIN_DNA_COMPLEX_SUBUNIT_ORGANIZATION	C5.GOBP_FEMALE_GAMETE_GENERATION
C5.GOMF_KINASE_ACTIVATOR_ACTIVITY	C5.GOBP_POSITIVE_REGULATION_OF_NUCLEAR_DIVISION
C5.GOBP_PROTEIN_LOCALIZATION_TO_CHROMOSOME_CENTROMERIC_REGION	C5.GOBP_HISTONE_SERINE_PHOSPHORYLATION
C5.GOMF_MICROTUBULE_BINDING	C5.GOBP_POSITIVE_REGULATION_OF_UBIQUITIN_PROTEIN_LIGASE_ACTIVITY
C5.GOBP_PROTEIN_POLYMERIZATION	C5.GOBP_ANIMAL_ORGAN_REGENERATION
C5.GOBP_PROTEIN_DEPOLYMERIZATION	C5.GOBP_CYTOKINESIS
C5.GOBP_POSITIVE_REGULATION_OF_CELL_CYCLE_PHASE_TRANSITION	C5.GOCC_OUTER_KINETOCHORE
C5.GOBP_MICROTUBULE_POLYMERIZATION_OR_DEPOLYMERIZATION	C5.GOMF_PROTEIN_C_TERMINUS_BINDING
C5.GOBP_POSITIVE_REGULATION_OF_MITOTIC_CELL_CYCLE	C5.GOBP_MITOTIC_SPINDLE_ASSEMBLY
C5.GOBP_POSITIVE_REGULATION_OF_CELL_CYCLE_G2_M_PHASE_TRANSITION	C5.GOBP_FEMALE_MEIOSIS_I
C5.GOBP_REGULATION_OF_MICROTUBULE_DEPOLYMERIZATION	C5.GOBP_REGULATION_OF_ATTACHMENT_OF_SPINDLE_MICROTUBULES_TO_KINETOCHORE
C5.GOBP_MITOTIC_CELL_CYCLE_CHECKPOINT_SIGNALING	C5.GOMF_CYCLIN_DEPENDENT_PROTEIN_SERINE_THREONINE_KINASE_ACTIVATOR_ACTIVITY
C5.GOCC_UBIQUITIN_LIGASE_COMPLEX	C5.GOBP_DNA_CONFORMATION_CHANGE
C5.GOBP_MEIOSIS_I_CELL_CYCLE_PROCESS	C5.GOBP_POSITIVE_REGULATION_OF_CHROMOSOME_SEGREGATION
C5.GOBP_REGULATION_OF_CELL_CYCLE_CHECKPOINT	C5.GOCC_MEIOTIC_SPINDLE
C5.GOBP_POSITIVE_REGULATION_OF_PROTEIN_MODIFICATION_BY_SMALL_PROTEIN_CONJUGATION_OR_REMOVAL	C5.GOBP_ATTACHMENT_OF_MITOTIC_SPINDLE_MICROTUBULES_TO_KINETOCHORE
C5.GOBP_NUCLEUS_ORGANIZATION	C5.GOBP_REGULATION_OF_PROTEIN_SERINE_THREONINE_KINASE_ACTIVITY
C5.GOBP_POSITIVE_REGULATION_OF_CYCLIN_DEPENDENT_PROTEIN_KINASE_ACTIVITY	C5.GOBP_REGULATION_OF_MITOTIC_CELL_CYCLE_SPINDLE_ASSEMBLY_CHECKPOINT
C5.GOBP_ESTABLISHMENT_OF_SPINDLE_ORIENTATION	C5.GOMF_DNA_BINDING_BENDING
C5.GOCC_FLEMMING_BODY	C5.GOBP_ANAPHASE_PROMOTING_COMPLEX_DEPENDENT_CATABOLIC_PROCESS
C5.GOBP_REGULATION_OF_MICROTUBULE_CYTOSKELETON_ORGANIZATION	C5.GOBP_NEGATIVE_REGULATION_OF_CELL_DIVISION
C2.KEGG_CELL_CYCLE	C5.GOBP_CELLULAR_PROCESS_INVOLVED_IN_REPRODUCTION_IN_MULTICELLULAR_ORGANISM
C2.KEGG_OOCYTE_MEIOSIS	C5.GOBP_PROTEIN_LOCALIZATION_TO_CONDENSED_CHROMOSOME
C2.KEGG_PROGESTERONE_MEDIATED_OOCYTE_MATURATION	C5.GOBP_MEIOTIC_CHROMOSOME_SEGREGATION
C2.KEGG_P53_SIGNALING_PATHWAY	C5.GOCC_ANAPHASE_PROMOTING_COMPLEX
C2.KEGG_UBIQUITIN_MEDIATED_PROTEOLYSIS	C5.GOBP_CYTOSKELETON_DEPENDENT_CYTOKINESIS
	C5.GOBP_NEGATIVE_REGULATION_OF_UBIQUITIN_PROTEIN_TRANSFERASE_ACTIVITY
	C5.GOMF_KINASE_ACTIVATOR_ACTIVITY
	C5.GOBP_PROTEIN_LOCALIZATION_TO_CHROMOSOME_CENTROMERIC_REGION
	C5.GOBP_PROTEIN_K11_LINKED_UBIQUITINATION
	C5.GOBP_POSITIVE_REGULATION_OF_CELL_CYCLE_G2_M_PHASE_TRANSITION
	C5.GOBP_POSITIVE_REGULATION_OF_UBIQUITIN_PROTEIN_TRANSFERASE_ACTIVITY
	C5.GOBP_REGULATION_OF_PROTEASOMAL_UBIQUITIN_DEPENDENT_PROTEIN_CATABOLIC_PROCESS
	C5.GOBP_REGULATION_OF_CELL_CYCLE_CHECKPOINT
	C5.GOBP_ESTABLISHMENT_OF_MITOTIC_SPINDLE_LOCALIZATION
	C5.GOBP_POSITIVE_REGULATION_OF_CYCLIN_DEPENDENT_PROTEIN_KINASE_ACTIVITY
	C5.GOMF_UBIQUITIN_LIKE_PROTEIN_LIGASE_BINDING
	C5.GOCC_SPINDLE_MIDZONE
	C5.GOMF_UBIQUITIN_LIKE_PROTEIN_CONJUGATING_ENZYME_ACTIVITY
	C5.GOBP_NEGATIVE_REGULATION_OF_MICROTUBULE_POLYMERIZATION_OR_DEPOLYMERIZATION
	C2.KEGG_OOCYTE_MEIOSIS
	C2.KEGG_CELL_CYCLE
	C2.KEGG_PROGESTERONE_MEDIATED_OOCYTE_MATURATION
	C2.KEGG_P53_SIGNALING_PATHWAY
